# Supplementary material for: 3D bioprinted silk fibroin hydrogels for tissue engineering
Source: Springer Nature journal article supplement (doi:10.1038/s41596-021-00622-1), 2021-10-29
Supplement: MOESM1 [file 41596_2021_622_MOESM1_ESM20.pdf]

---

**Supplementary information**

---

**3D bioprinted silk fibroin hydrogels for tissue engineering**

---

In the format provided by the  
authors and unedited

## **SUPPLEMENTARY INFORMATION**

### **3D bioprinted silk fibroin hydrogels for tissue engineering**

Soon Hee Kim<sup>1,7</sup>, Heesun Hong<sup>1,7</sup>, Olatunji Ajiteru<sup>1,7</sup>, Md. Tipu Sultan<sup>1,7</sup>, Young Jin Lee<sup>1</sup>, Ji Seung Lee<sup>1</sup>, Ok Joo Lee<sup>1</sup>, Hanna Lee<sup>1</sup>, Hae Sang Park<sup>1,2</sup>, Kyu Young Choi<sup>1,3</sup>, Joong Seob Lee<sup>1,4</sup>, Hyung Woo Ju<sup>5</sup>, In-Sun Hong<sup>6</sup>, Chan Hum Park<sup>1,2,\*</sup>

<sup>1</sup>Nano-Bio Regenerative Medical Institute, College of Medicine, Hallym University, Chuncheon 24252, Republic of Korea. <sup>2</sup>Departments of Otorhinolaryngology-Head and Neck Surgery, Chuncheon Sacred Heart Hospital, School of Medicine, Hallym University, Chuncheon 24252, Republic of Korea. <sup>3</sup>Department of Otorhinolaryngology, Kangnam Sacred Heart Hospital, Hallym University College of Medicine, Seoul 07441, Republic of Korea, <sup>4</sup>Department of Otorhinolaryngology, Hallym University Sacred Heart Hospital, Anyang 14068, Republic of Korea, <sup>5</sup>Nano-Bio Regenerative Technology Company Ltd. 56-16, Toegyegondan 1-gil, Chuncheon, Gangwon-do 24427, Republic of Korea, <sup>6</sup>Department of Molecular Medicine, School of Medicine, Gachon University, Incheon, 406-840, Republic of Korea, <sup>7</sup>These authors contributed equally to this work.

\*email: hlpch@paran.com

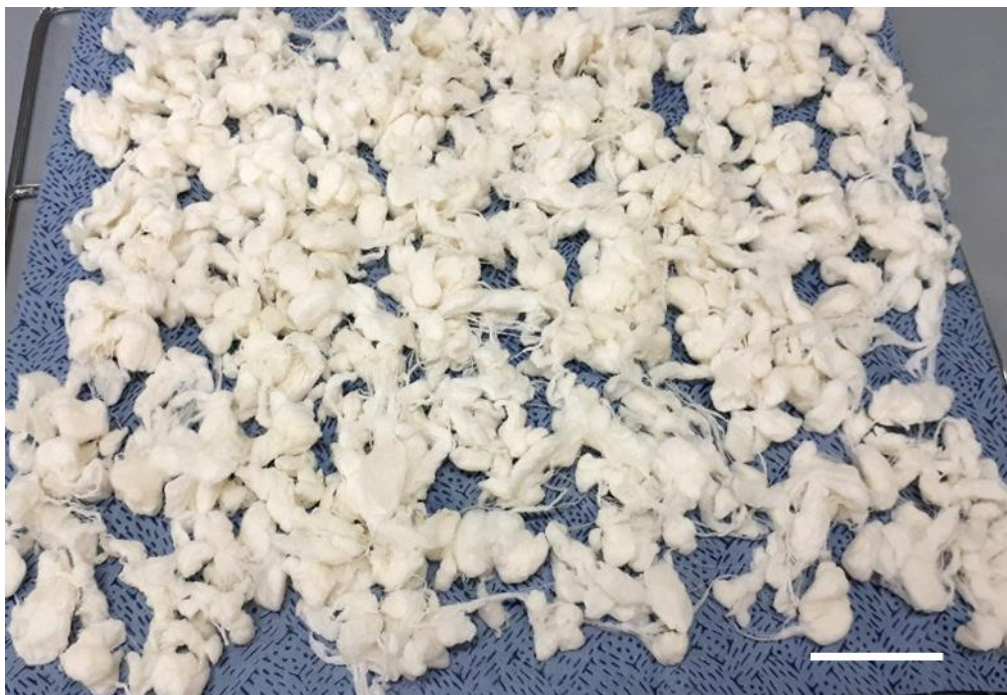

**Supplementary Figure 1.** Silk fibroin (degummed silk) after dehydration. After measuring the weight of cut cocoons (40 g), the silk was degummed in 1 L of 0.05 M sodium carbonate ( $\text{Na}_2\text{CO}_3$ ) for 1 h. The degummed silk was rinsed 2-3 times with DW followed by dehydration in the flow oven overnight. Scale bar: 5 cm
